# Supplementary material
Source: PubMed Central journal article supplement (PMC4341471)
Supplement: ASN.2013111152_ASN2013111152SupplementaryData.pdf [file ASN.2013111152_ASN2013111152SupplementaryData.pdf]

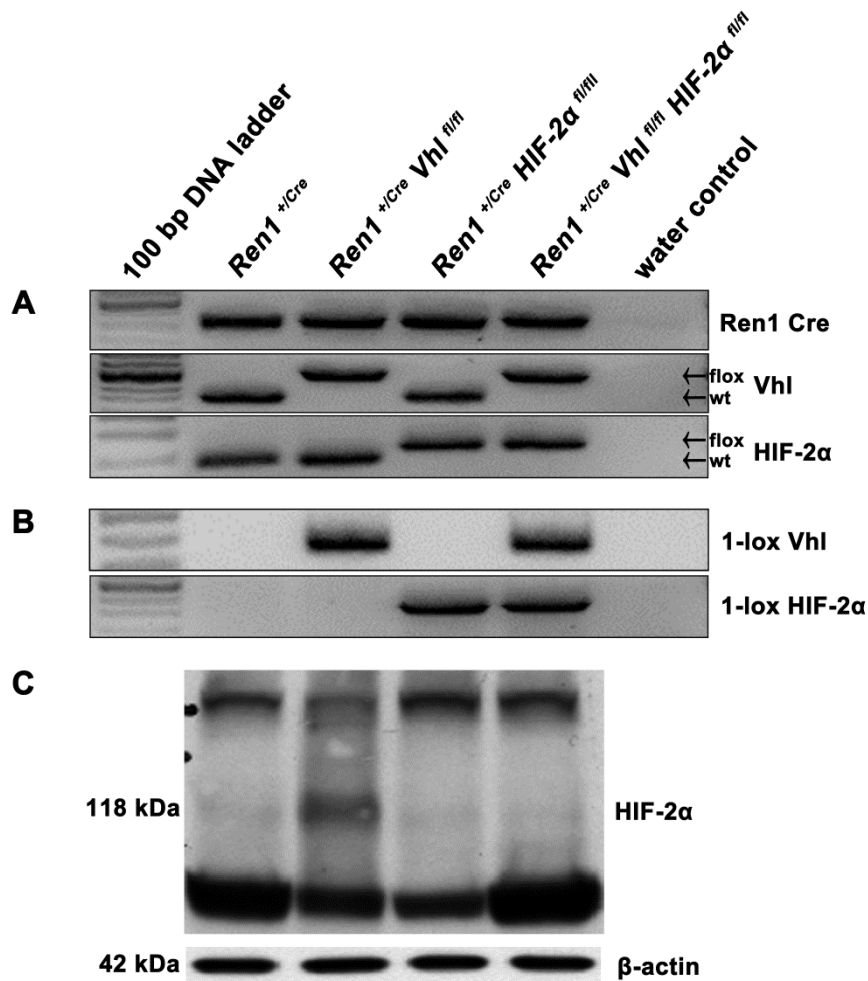

### Supplemental Figure 1

**Efficacy of renin-1d Cre / flox (for Vhl and HIF-2α respectively) recombination resulting in HIF-2α stabilization only in glomerulus preparations of *Ren1*<sup>+Cre</sup> *Vhl*<sup>fl/fl</sup> mice.** Glomerulus preparations of each genotype were analyzed with respect to the genotype, recombination and HIF-2α protein. (A) PCR genotyping of the four genotypes with specific primers for the renin-1d Cre, floxed Vhl, wildtype (wt) Vhl, floxed HIF-2α and wt HIF-2α alleles resulting in 400 bp, 450 bp, 270 bp, 220 bp and 182 bp fragments, respectively. (B) The efficacy of the renin-Cre / flox recombination was assessed by the genotyping protocol, which produces an amplicon of the recombined Vhl gene at 260 bp and the HIF-2α gene at 340 bp. We therefore assumed that the Vhl and the HIF-2α gene respectively, dependent on the genotype, were substantially disrupted in the renin cell lineage. (C) Immunoblot for HIF-2α (and β-actin as a control) shows HIF-2α stabilization (at 118 kDa) only in glomerulus preparations of *Ren1*<sup>+Cre</sup> *Vhl*<sup>fl/fl</sup> mice. Glomerulus preparations of *Ren1*<sup>+Cre</sup> *Vhl*<sup>fl/fl</sup> *HIF-2α*<sup>fl/fl</sup> mice with recombined Vhl and HIF-2α genes lack HIF-2α stabilization.
